# Supplementary material for: Preparation and Characterization of Isosorbide-Based Self-Healable Polyurethane Elastomers with Thermally Reversible Bonds
Source: MDPI journal article supplement (doi:10.3390/molecules24061061), 2019-03-18
Supplement: s1 [file s1]

< Supplementary Information >

## Preparation and characterization of isosorbide-based self-healable polyurethane elastomers with thermally reversible bonds

Han-Na Kim <sup>1,†</sup>, Dae-Woo Lee <sup>1,†</sup>, Hoon Ryu <sup>2</sup>, Gwang-Seok Song <sup>2</sup>, and Dai-Soo Lee <sup>1,\*</sup>

<sup>1</sup> Division of Semiconductor and Chemical Engineering, Chonbuk National University, 567 Baekjedaero, Deokjin-gu, Jeonju, 54896, Republic of Korea; hnk07@hanmail.net (H.N.K.); dwlee2310@hanmail.net (D.W.L.)

<sup>2</sup> Industrial Biotechnology Program, Chemical R&D Center, Samyang Corporation, Daedeok-daero 730, Yuseong-gu, Daejeon 34055, Republic of Korea; hoon.ryu@samyang.com (H.R.); gwangseok.song@samyang.com (G.S.S)

<sup>†</sup> Contributed equally to this work

\* Correspondence: daisoolee@jbnu.ac.kr (D.S.L); Tel.: +82-63-270-2310

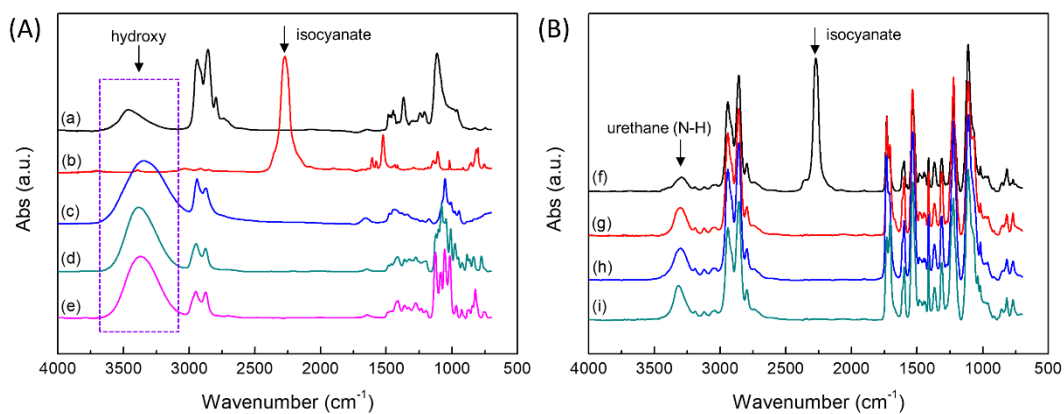

Figure S1. FT-IR spectra of raw materials(A), synthesized prepolymer and PUEs(B): (a) PTMEG; (b) MDI; (c) BD; (d) ISB; (e) IMN; (f) prepolymer; (g) BD-PU; (h) ISB-PU; (i) IMN-PU.

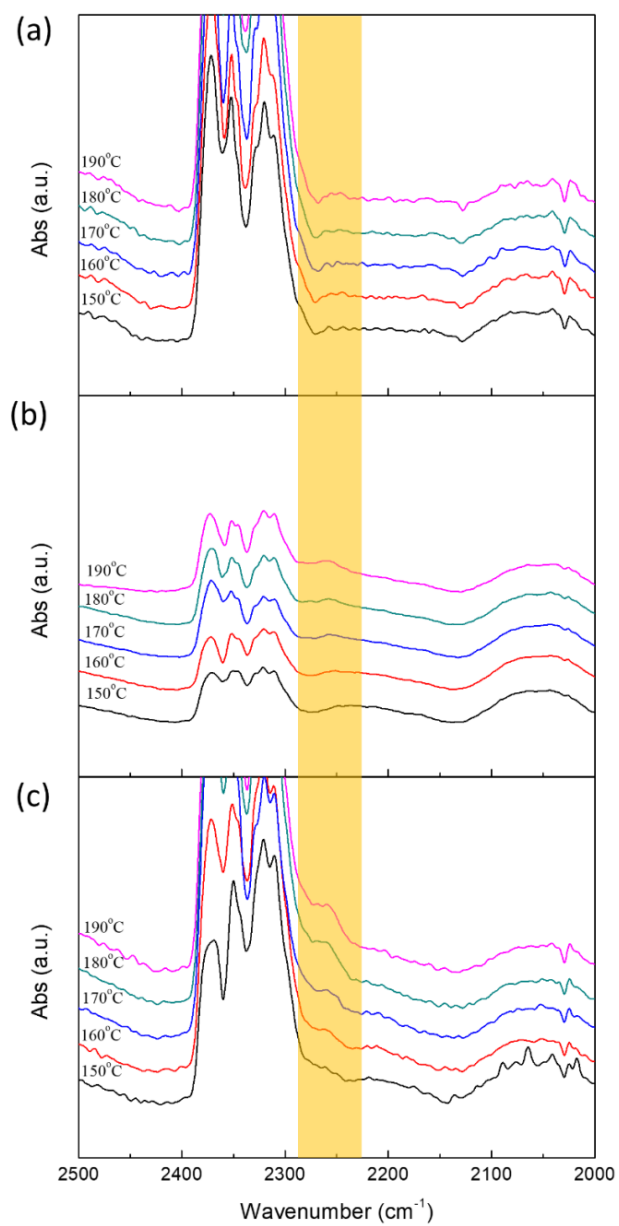

Figure S2. FT-IR spectra of PUEs at elevated temperatures: (a) BD-PU, (b) ISB-PU, and (c) IMN-PU. In FT-IR spectra of ISB-PU and IMN-PU, the peak intensities of absorbances due to isocyanate groups generated by the reversible urethane bonds increased with heating while those of BD-PU did hardly.

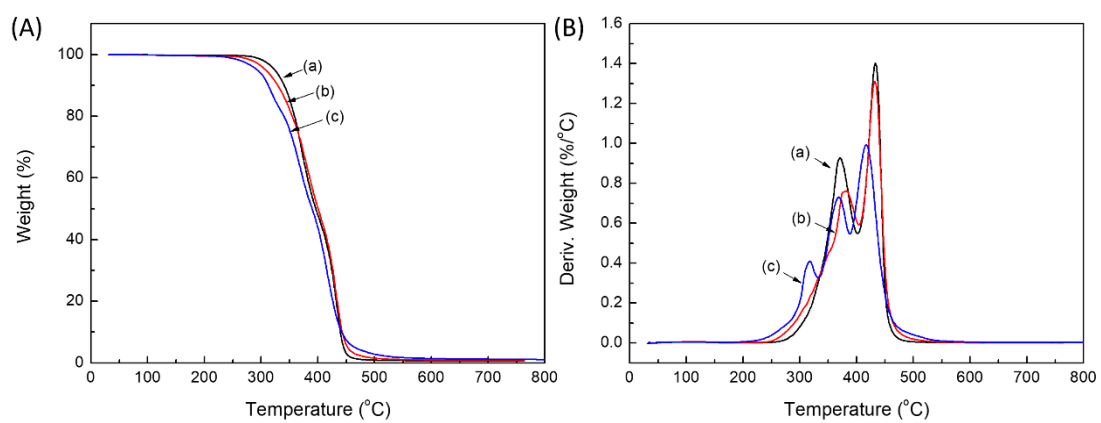

Figure S3. TGA thermograms and 1<sup>st</sup> derivative of TGA curve of PUEs: (a) BD-PU, (b) ISB-PU, and (c) IMN-PU.
